# Supplementary material for: Green Synthesis, Characterization, In Silico Molecular Docking and Biological Evaluation of Imidazolylchalcones as Promising Fungicide/s and Nematicide/s
Source: Research Square preprint supplement (doi:10.21203/rs.3.rs-5803429/v1), 2025-01-15
Supplement: Supplementary file 1 [file 10ff1340e09d93acf6a26fcb.docx]

**Green Synthesis, Characterization, *In Silico* Molecular Docking and Biological Evaluation of Imidazolylchalcones as Promising Fungicide/s and Nematicide/s**

Rakesh Kumar1,2,3, Parshant Kaushik1, Kailashpati Tripathi1,4, Rajni Godara1,, Sameer Ranjan Misra1, Vijay Kumar1, Patha Chandra Mondal1,Jeetram1, Pankaj5, Virendra Singh Rana1, V. Shanmugam6, Dilip Khatri7 and Najam Akhtar Shakil1*

1Division of Agricultural Chemicals, ICAR-Indian Agricultural Research Institute, New Delhi, India

2The Graduate School, ICAR-Indian Agricultural Research Institute, New Delhi, India

3ICAR-Central Inland Fisheries Research Institute, RC, Guwahati, Assam, India

4ICAR- National Research Centre on Seed Spices, Ajmer, Rajasthan. India

5Division of Nematology, ICAR-Indian Agricultural Research Institute, New Delhi, India

6Division of Plant Pathology, ICAR-Indian Agricultural Research Institute, New Delhi, India

7PI Industries, Udaipur, India

*Corresponding author’s E-mail address: iamshakil@gmail.com

**Supporting Information**

**1H-NMR, 13C-NMR and HRMS spectra of most effective compounds IC-1, IC-4, IC-6 and IC-8 (imidazolylchalcone derivatives)**

**IC-1:**


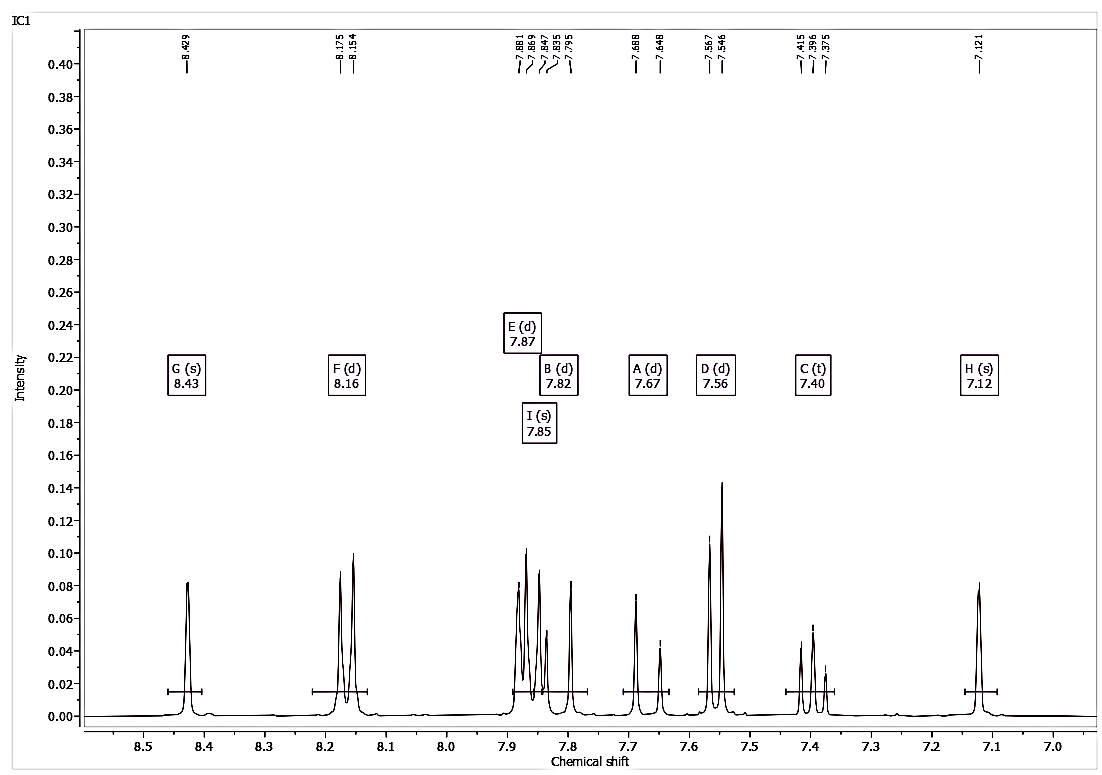
**Fig 1: 1H-NMR spectrum of IC-1**


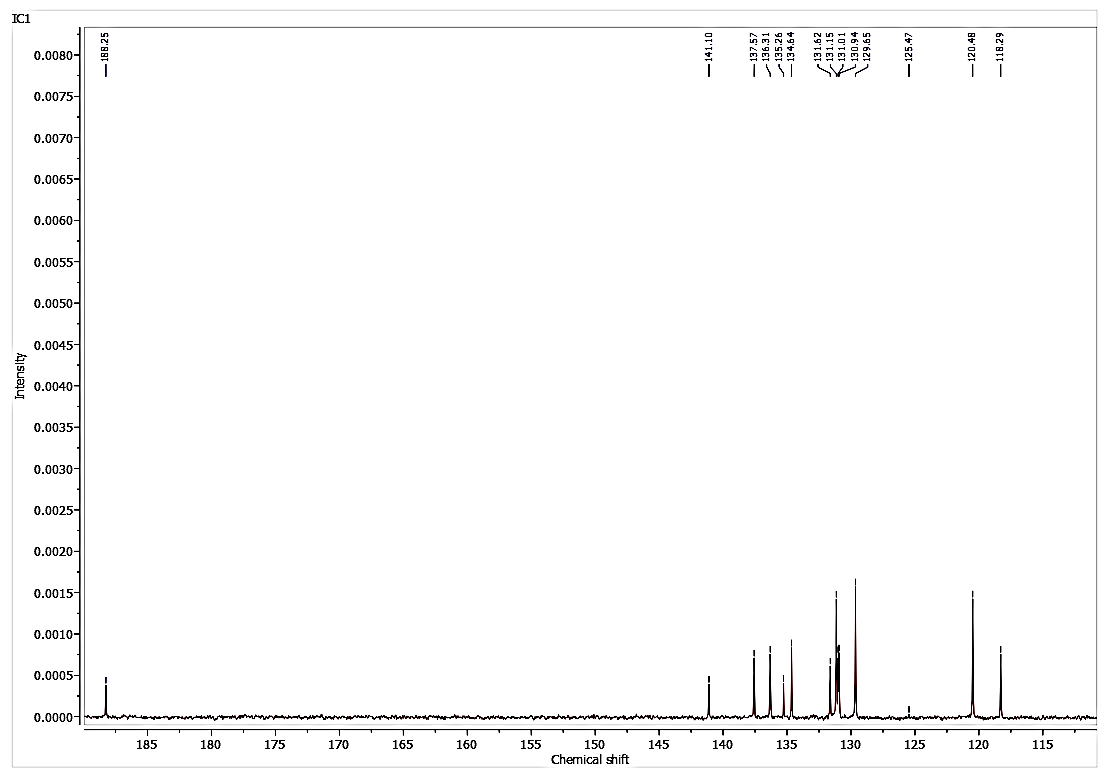
**Fig 2: 13C-NMR spectrum of IC-1**


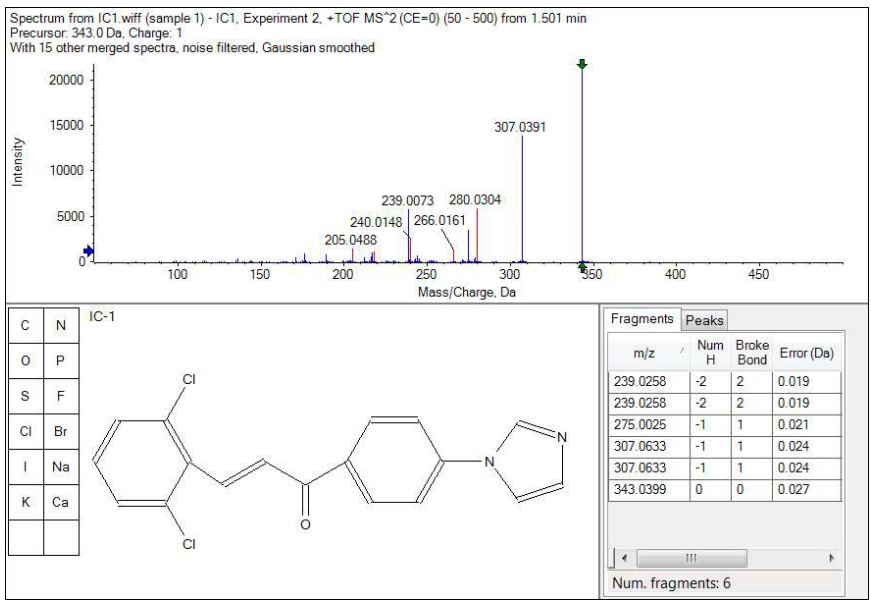


**Fig 3: HRMS spectrum of IC-1**

**IC-4:**


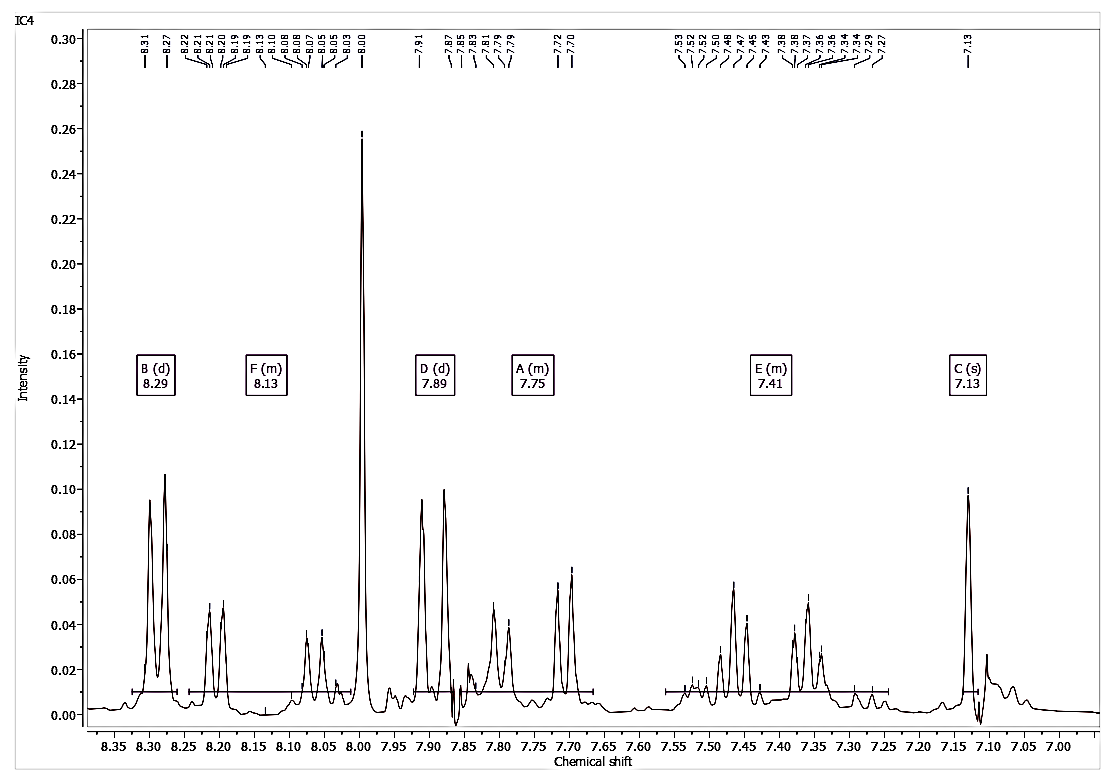


**Fig 4: 1H-NMR spectrum of IC-4**


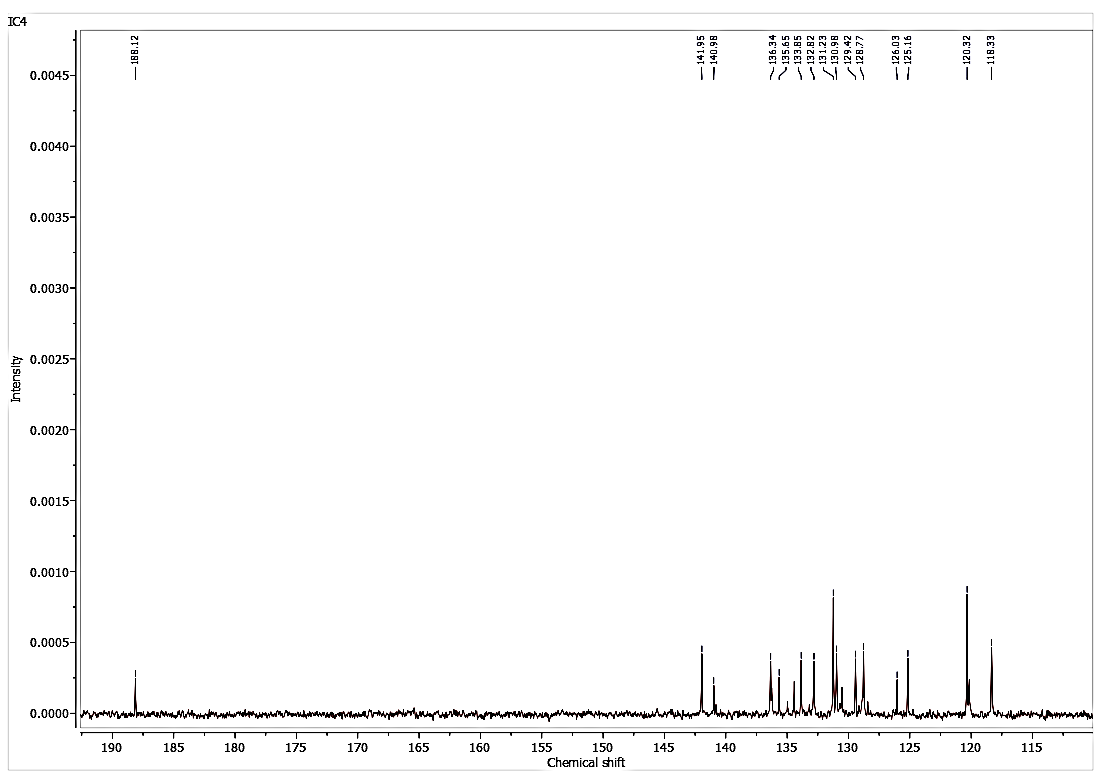


**Fig 5: 13C-NMR spectrum of IC-4**


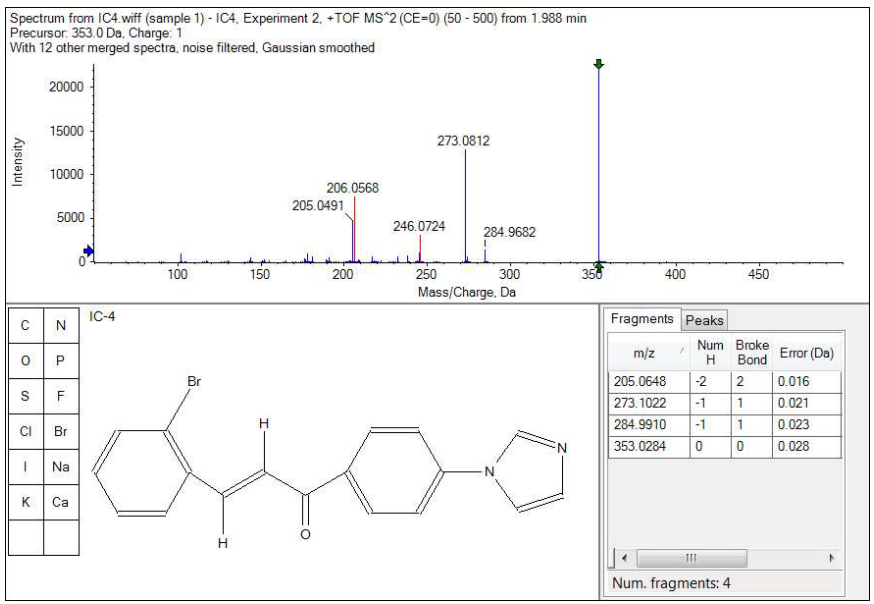


**Fig 6: HRMS spectrum of IC-4**

**IC-6:**


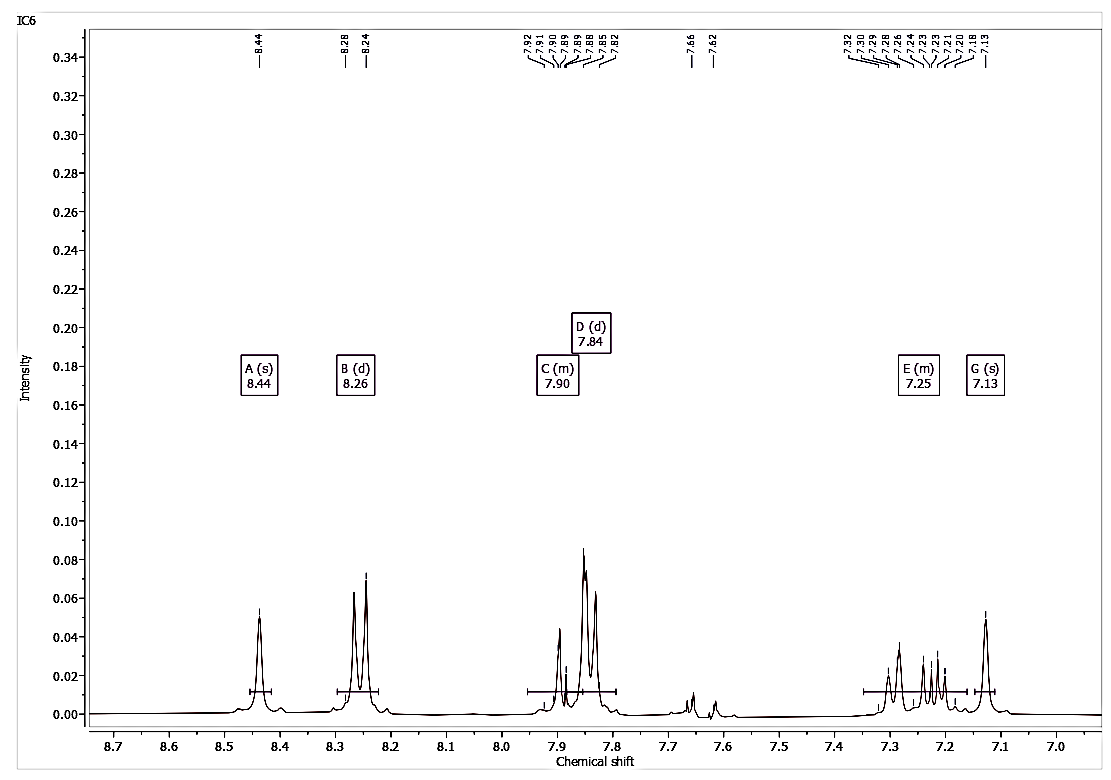
**Fig 7: 1H-NMR spectrum of IC-6**


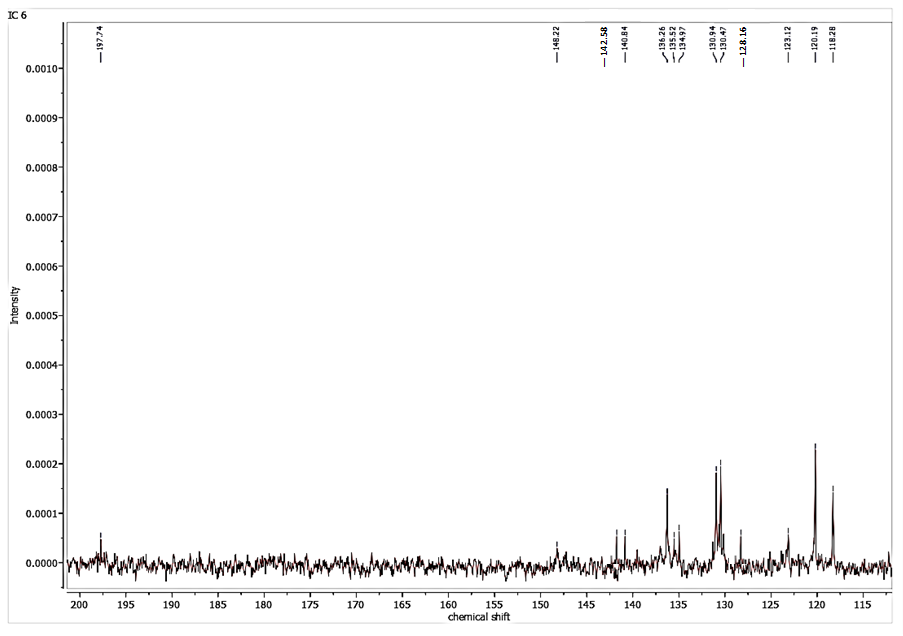
**Fig 8: 13C-NMR spectrum of IC-6**


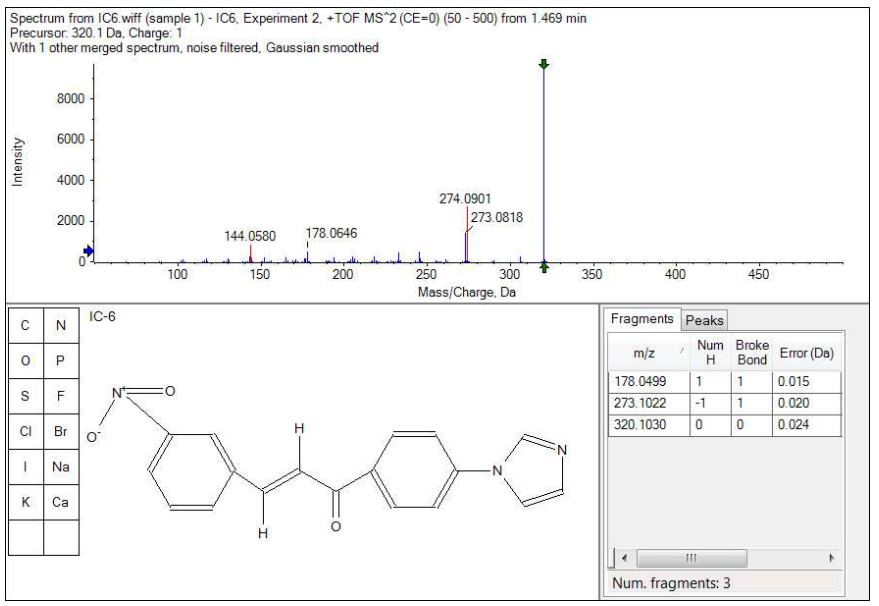


**Fig 9: HRMS spectrum of IC-6**

**IC-8:**


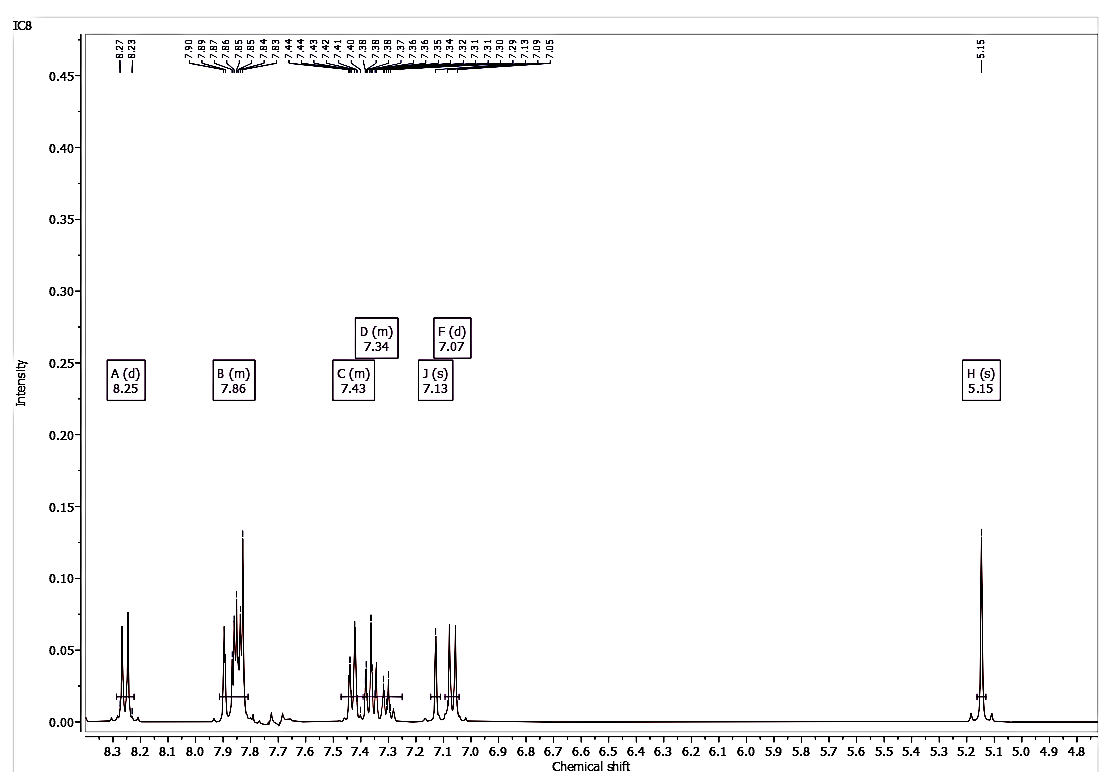
**Fig 10: 1H-NMR spectrum of IC-8**


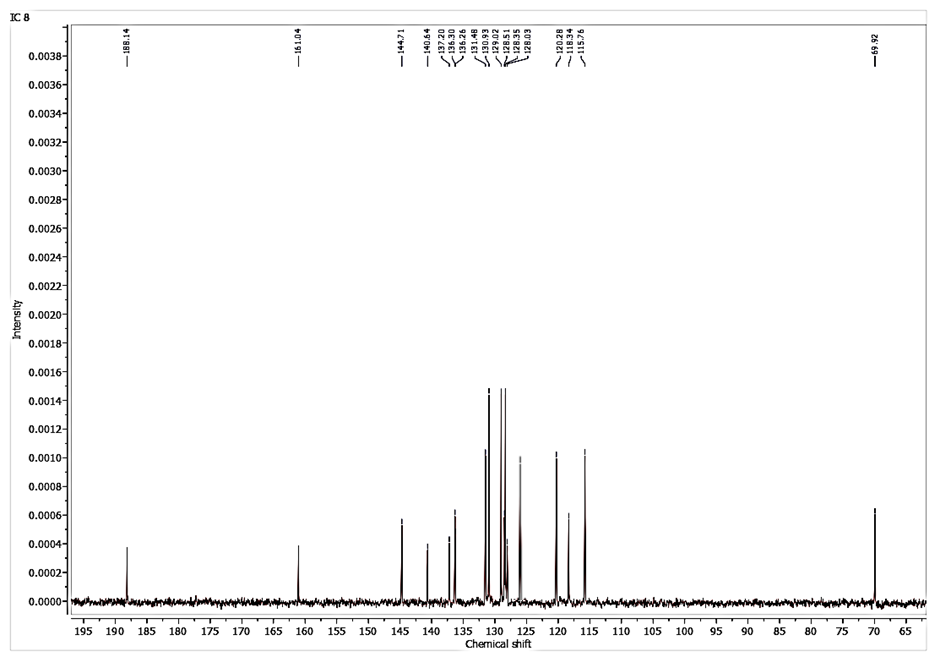
**Fig 11: 13C-NMR spectrum of IC-8**


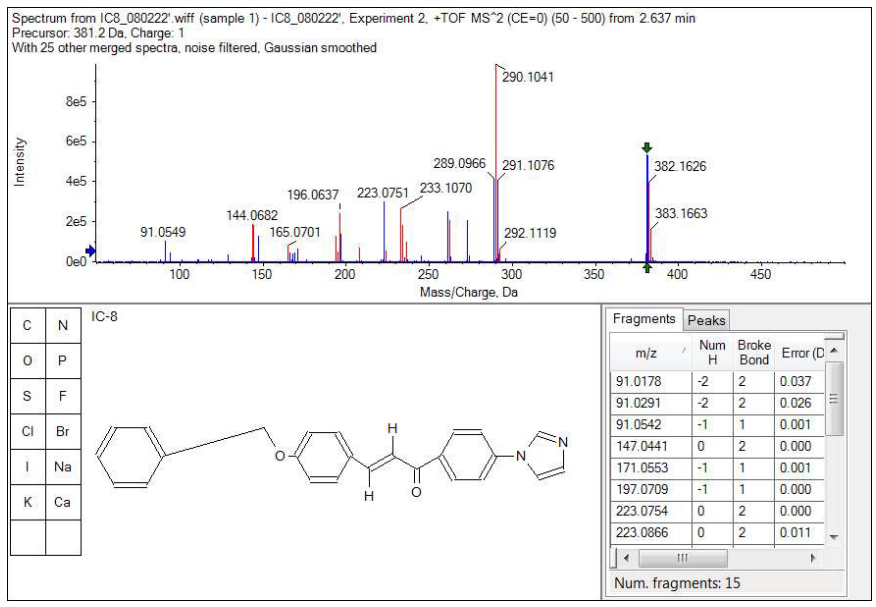


**Fig 12: HRMS spectrum of IC-8**
